# Supplementary material for: Diagnostic Accuracy of ARK Checker® C/G – DyLight® 488: Simultaneous Detection of Giardia and Cryptosporidium by Fluorescent Antibody Microscopy
Source: Research Square preprint supplement (doi:10.21203/rs.3.rs-8244780/v1), 2025-12-11
Supplement: Supplementary file 1 [file 3ade9ddfd21126e45e20c9d5.xlsx]

## Sheet: Suppl_data_1
Sample ID	Sample type	Bristol scale	Diagnosis of O&P (bright field and FAM-TEST)	Rapid IC test (GIARDIA/CRYPTOSPORIDIUM QUIK CHEK™)	Multiplex PCR (FilmArray Intestinal Panel©)
OAK-1	Stool	7	Giardia	Giardia	Giardia lamblia, Enteroaggregative Escherichia coli (EAEC)
OAK-2	Stool	4	Giardia	Giardia	Giardia lamblia, Enteropathogenic Escherichia coli (EPEC), Campylobacter
OAK-3	Stool	7	Giardia, Entamoeba	Giardia	Giardia lamblia
OAK-4	Stool	6	Giardia	Giardia	Giardia lamblia
OAK-5	Stool	5	Giardia	Giardia	Giardia lamblia
OAK-6	Stool	4	Giardia, Entamoeba	Giardia	Giardia lamblia
OAK-7	Stool	5	Giardia	Giardia	Giardia lamblia
OAK-8	Stool	5	Giardia	Giardia	Giardia lamblia, Enteropathogenic Escherichia coli (EPEC), Campylobacter
OAK-9	Stool	7	Giardia	Giardia	Giardia lamblia, Enteroaggregative Escherichia coli (EAEC), Campylobacter
OAK-10	Stool	7	Giardia, Entamoeba	Giardia	Giardia lamblia, Enteroaggregative Escherichia coli (EAEC)
OAK-11	Stool	4	Giardia	Giardia	Giardia lamblia, Shigella/ Enteroinvasive Escherichia coli (EIEC)
OAK-12	Stool	6	Giardia	Giardia	Giardia lamblia, Enteroaggregative Escherichia coli (EAEC)
OAK-13	Stool	5	Giardia	Giardia	Giardia lamblia
OAK-14	Stool	6	Giardia	Giardia	Giardia lamblia, Entamoeba histolytica, Enteroaggregative Escherichia coli (EAEC), Norovirus GI/GII
OAK-15	Stool	5	Giardia	Giardia	Giardia lamblia
OAK-16	Stool	5	Giardia	Giardia	Giardia lamblia, Entamoeba histolytica
OAK-17	Stool	5	Giardia	Giardia	Giardia lamblia, Cryptosporidium
OAK-18	Stool	5	Giardia	Giardia	Giardia lamblia, Enteropatogenic E. coli (EPEC), Norovirus G1/G2
OAK-19	Stool	7	Giardia	Giardia	Giardia lamblia
OAK-20	Stool	7	Giardia	Giardia	Giardia lamblia, Enteroaggregative Escherichia coli (EAEC)
OAK-21	Stool	7	Giardia, Cryptosporidium	Giardia	Giardia lamblia, Cryptosporidium, Entamoeba histolytica
OAK-22	Stool	5	Giardia, Cryptosporidium	Giardia, Cryptosporidium	Giardia lamblia, Cryptosporidium, Enteropatogenic E. coli (EPEC), Enterotoxigenic E. coli (ETEC) lt/st
OAK-23	Stool	7	Cryptosporidium	Cryptosporidium	Cryptosporidium
OAK-24	Stool	7	Cryptosporidium	Cryptosporidium	Cryptosporidium
OAK-25	Stool	7	Cryptosporidium	Cryptosporidium	Cryptosporidium, Enteropatogenic E. coli (EPEC), Clostridioides difficile toxin A/B
OAK-26	Stool	5	Cryptosporidium	Cryptosporidium	Cryptosporidium
OAK-27	Stool	7	Cryptosporidium	Cryptosporidium	Cryptosporidium, Campylobacter
OAK-28	Stool	7	Cryptosporidium	Cryptosporidium	Cryptosporidium
OAK-29	Stool	7	Cryptosporidium	Cryptosporidium	Cryptosporidium
OAK-30	Stool	7	Cryptosporidium	Cryptosporidium	Cryptosporidium, Enterotoxigenic E. coli (ETEC) lt/st, Enteropatogenic E. coli (EPEC), Vibrio cholerae
OAK-31	Stool	5	Cryptosporidium	Cryptosporidium	Cryptosporidium
OAK-32	Stool	7	Cryptosporidium	Cryptosporidium	Giardia lamblia, Cryptosporidium
OAK-33	Stool	7	Cryptosporidium	Cryptosporidium	Cryptosporidium, Norovirus GⅠ/GⅡ
OAK-34	Stool	6	Cryptosporidium	Cryptosporidium	Cryptosporidium, Campylobacter
OAK-35	Stool	6	Cryptosporidium	Cryptosporidium	Cryptosporidium
OAK-36	Stool	7	Entamoeba	Negative	Entamoeba histolytica
OAK-37	Stool	6	Cyclospora	Negative	Cyclospora cayetanensis
OAK-38	Stool	4	Entamoeba	Negative	Entamoeba histolytica
OAK-39	Stool	5	Entamoeba	Negative	Norovirus GⅠ/GⅡ
OAK-40	Stool	6	Sarcocystis	Negative	Negative
OAK-41	Stool	5	Negative	Negative	Giardia lamblia, E. histolytica
OAK-42	Stool	4	Negative	Negative	Negative
OAK-43	Stool	6	Entamoeba	Negative	Entamoeba histolytica Campylobacter, Sapovirus
OAK-44	Stool	5	Negative	Negative	Yersinia enterocolitica
OAK-45	Stool	4	Cyclospora	Negative	Cyclospora cayetanensis
OAK-46	Stool	5	Negative	Negative	Entamoeba histolytica
OAK-47	Stool	6	Negative	Negative	Entamoeba histolytica
OAK-48	Stool	5	Taenia solium	Negative	Giardia lamblia, Enteroaggregative Escherichia coli (EAEC), Enteropatogenic E. coli (EPEC)
OAK-49	Stool	7	Negative	Negative	Enteropatogenic E. coli (EPEC)
OAK-50	Stool	4	Entamoeba	Negative	Negative
OAK-51	Stool	6	Entamoeba	Negative	Negative
OAK-52	Stool	6	Negative	Negative	Entamoeba histolytica
OAK-53	Stool	7	Negative	Negative	Clostridioides difficile toxin A/B
OAK-54	Stool	4	Entamoeba	Negative	Entamoeba histolytica
OAK-55	Stool	7	Negative	Negative	Negative
OAK-56	Stool	7	Negative	Negative	Negative
OAK-57	Stool	5	Negative	Negative	Enteropatogenic E. coli (EPEC)
OAK-58	Stool	7	Negative	Negative	Rotavirus A
OAK-59	Stool	7	Negative	Negative	Negative
OAK-60	Stool	6	Negative	Negative	Negative
OAK-61	Stool	5	Negative	Negative	Negative
OAK-62	Stool	7	Negative	Negative	Campylobacter
OAK-63	Stool	5	Negative	Negative	Negative
OAK-64	Stool	7	Negative	Negative	Negative
OAK-65	Stool	4	Negative	Negative	Negative
OAK-66	Stool	6	Negative	Negative	Enteropatogenic E. coli (EPEC)
OAK-67	Stool	6	Negative	Negative	Negative
OAK-68	Stool	7	Negative	Negative	Negative
OAK-69	Stool	6	Negative	Negative	Enteroaggregative Escherichia coli (EAEC), Shiga-like toxin-producing Escherichia coli（STEC）stx1/stx2, Campylobacter, Plesiomonas shigelloides
OAK-70	Stool	5	Negative	Negative	Negative
OAK-71	Stool	7	Negative	Negative	Negative
OAK-72	Stool	5	Negative	Negative	Enteropatogenic E. coli (EPEC), Enterotoxigenic E. coli (ETEC) lt/st
OAK-73	Stool	5	Negative	Negative	Negative
OAK-74	Stool	7	Negative	Negative	Negative
OAK-75	Stool	7	Negative	Negative	Negative
OAK-76	Stool	6	Negative	Negative	Clostridioides difficile toxin A/B
OAK-77	Stool	5	Negative	Negative	Negative
OAK-78	Stool	5	Negative	Negative	Negative
OAK-79	Stool	6	Negative	Negative	Campylobacter
OAK-80	Stool	7	Negative	Negative	Negative
OAK-81	Stool	4	Negative	Negative	Negative
OAK-82	Stool	4	Negative	Negative	Negative
OAK-83	Stool	4	Negative	Negative	Negative
OAK-84	Stool	5	Negative	Negative	Negative
